# Supplementary material for: Reversal of handedness of ionic liquid-based chiral block copolymers via self-assembly in solution and bulk phase
Source: Royal Society of Chemistry journal article supplement (doi:10.1039/d2py00186a), 2022-01-01
Supplement: d2py00186a1.pdf [file d2py00186a1.pdf]

## **Supporting Information**

# Reversal of Handedness of Ionic liquid based Chiral Block Copolymers via Self-Assembly in solution and bulk phase

*Puhup Puneet,<sup>a</sup> Labeesh Kumar,<sup>b</sup> Sajan Singh,<sup>a</sup> Andriy Horechyy,<sup>b</sup> Rajiv K.  
Srivastava,<sup>a</sup> Bhanu Nandan<sup>a\*</sup>*

<sup>a</sup>Department of Textile Technology, Indian Institute of Technology Delhi, New Delhi,  
India

<sup>b</sup>Department of Nanostructured Materials, Leibniz Institute for Polymer Research,  
Hohe Strasse 6, Dresden, Germany

## 1. SAXS Profile of PS-P4VP neat:

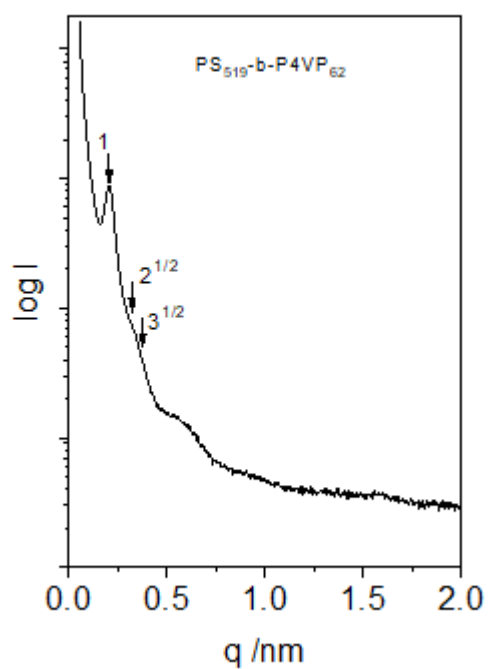

**Figure S1:** 1D-SAXS profile of self-assembled bulk morphology of PS<sub>519</sub>-P4VP<sub>62</sub>.

## 2. <sup>1</sup>H-NMR spectrum of PS-P2VP and PS-BuP2VP-Br

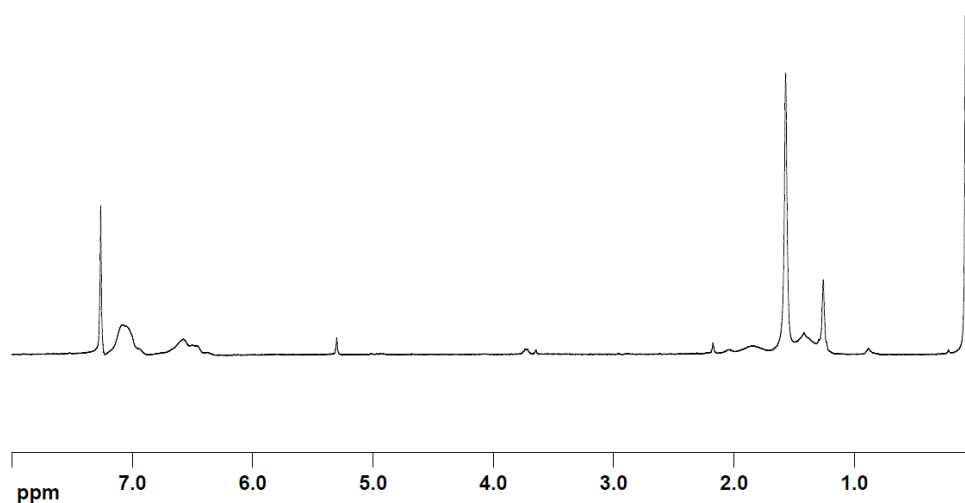

**Figure S2:** <sup>1</sup>H-NMR spectrum of PS-BuP4VP-Br.
